# Supplementary material
Source: PubMed Central journal article supplement (PMC1803723)
Supplement: plntphys_pp.106.090761_1.pdf [file plntphys_pp.106.090761_1.pdf]

**Supplemental Material**

**Table I, Supplemental Material. Gene structure information for Arabidopsis GATA factor genes**

<sup>a</sup> Genes are numbered according to Jeong and Shih (2003). The lengths of 5' and 3' UTRs are given in nucleotides and the presence in 5' UTRs of motifs with roles in translational control is indicated. The lengths of longer introns are also given.

| GATA gene <sup>a</sup> | Gene ID   | 5' leader length (nt) | Intron | CATT                     | FED-A               | C/T-rich sequences                    | Other             | suORF                                              | AUG sequence context | 3' UTR length (nt) |
|------------------------|-----------|-----------------------|--------|--------------------------|---------------------|---------------------------------------|-------------------|----------------------------------------------------|----------------------|--------------------|
| 1                      | At3g24050 | 138                   |        | 1x (CATT) <sub>1</sub> . |                     |                                       |                   |                                                    | GACTATGGA            | 215                |
| 2                      | At2g45050 | 86                    |        | -                        |                     |                                       |                   |                                                    | AACAATGGA            | 238                |
| 3                      | At4g34680 | 77                    | 215nt  | 1x (CATT) <sub>1</sub> . |                     | TCTCTCTT<br>CCTCT                     |                   |                                                    | GTGAATGGA            | 130                |
| 4                      | At3g60530 | 71                    |        | -                        |                     |                                       |                   |                                                    | AACAATGGA            | 236                |
| 5                      | At5g66320 | 198                   | 325nt  |                          |                     |                                       |                   | 33nt (incl. ATG, but not TGA). suORF to ATG, 110nt | GAAAATGGA            | 253                |
| 6                      | At3g51080 | 134                   | 292nt  | .                        |                     |                                       |                   | 27nt (incl. ATG, but not TAA). suORF to ATG, 82nt  | AATAATGGA            | 224                |
| 7                      | At4g36240 | 10 (very short)       |        |                          | 1x<br>ACAAAA/TTTTGT |                                       |                   |                                                    | AAAAATGGA            | 180                |
| 8                      | At3g54810 | 165                   | 529nt  | .                        |                     | (TTC) <sub>9</sub>                    |                   |                                                    | AAACATGAT            | 455                |
| 9                      | At4g32890 | 128                   |        |                          |                     | CTCTTCTT<br>CTTCTTCT                  |                   | 18nt (incl. ATG, but not TAA). suORF to ATG, 105nt | CTTGATGGA            | 147                |
| 10                     | At1g08000 | 223                   | 322nt  | 1x (CATT) <sub>1</sub> . |                     |                                       |                   |                                                    | CAAGATGAA            | 220                |
| 11                     | At1g08010 | 175                   | 442nt  |                          |                     | (TC) <sub>6</sub> , (TC) <sub>9</sub> |                   |                                                    | TAGCATGAA            | 276                |
| 12                     | At5g25830 | 47                    |        |                          |                     |                                       | 3x A <sub>6</sub> |                                                    | ACTTATGGA            | 85                 |
| 13                     | At2g28340 | 139                   | 861nt  |                          |                     | (TC) <sub>7</sub>                     |                   | 102nt (incl. ATG, but not TAG). suORF to ATG, 29nt | ACAAATGAA            | 198                |
| 14                     | At3g45170 | N.D.                  |        | -                        |                     |                                       |                   |                                                    | AAGAATGTC            | 73                 |
| 15                     | At3g06740 | 239                   |        |                          | 1x<br>ACAAAA/TTTTGT | (TC) <sub>5</sub>                     |                   | 36nt (incl. ATG, but not TAG). suORF to ATG, 63nt  | GGTAATGCT            | 202                |
| 16                     | At5g49300 | 216                   |        | .                        |                     |                                       |                   | ATGTGA                                             | CAGAATGCT            | N.D.               |

|    |           |                    |       |                          |                     |                            |                                                                               |                                                                   |           |     |
|----|-----------|--------------------|-------|--------------------------|---------------------|----------------------------|-------------------------------------------------------------------------------|-------------------------------------------------------------------|-----------|-----|
|    |           |                    |       | 1x (CATT) <sub>1</sub> . |                     |                            |                                                                               | adjacent initiation and termination codons                        |           |     |
| 17 | At3g16870 | 78                 |       | -                        |                     | (TC) <sub>7</sub>          |                                                                               |                                                                   | AAAGATGTC | 166 |
| 18 | At3g50870 | 122                |       | -                        |                     |                            |                                                                               |                                                                   | AGCGATGAT | 239 |
| 19 | At4g36620 | 85                 |       | .                        |                     | TCTCTTTC<br>TCCTTCT<br>CTC | 3x A <sub>6</sub> /T <sub>6</sub>                                             |                                                                   | AGTGATGGG | 48  |
| 20 | At2g18380 | 79                 |       | 1x (CATT) <sub>1</sub> . |                     |                            |                                                                               |                                                                   | TTTCATGAT | 258 |
| 21 | At5g56860 | 116                |       | 1x (CATT) <sub>1</sub> . |                     | (TC) <sub>5</sub>          |                                                                               | 24nt (incl. ATG, but not TAG). suORF to ATG, 45nt                 | ATCAATGGA | 365 |
| 22 | At4g26150 | 87                 |       |                          | 1x<br>ACAAAA/TTTTGT |                            |                                                                               |                                                                   | GGTCATGGG | 245 |
| 23 | At5g26930 | 126                |       | -                        |                     |                            |                                                                               |                                                                   | TTTGATGGA | 136 |
| 24 | At3g21175 | 196                | 600   | 2x (CATT) <sub>1</sub> . | 1x<br>ACAAAA/TTTTGT |                            |                                                                               |                                                                   | GACCATGGA | 212 |
| 25 | At4g24470 | 139                |       |                          | 1x<br>ACAAAA/TTTTGT |                            |                                                                               | 30nt (incl. ATG, but not TGA). suORF to ATG, 77nt<br>Also ATGTGA. | TCCGATGTT | 206 |
| 26 | At4g17570 | 446<br>(very long) |       | 1x (CATT) <sub>1</sub> . | 2x<br>ACAAAA/TTTTGT |                            | 7x A <sub>6</sub> /T <sub>6</sub> ,<br>4x<br>A <sub>5</sub> T/AT <sub>5</sub> |                                                                   | TATTATGGG | 427 |
| 27 | At5g47140 | 420<br>very long   |       | 3x (CATT) <sub>1</sub> . | 3x<br>ACAAAA/TTTTGT | (TC) <sub>8</sub>          | 6x A <sub>6</sub> /T <sub>6</sub> .                                           |                                                                   | AAAGATGGG | 187 |
| 28 | At1g51600 | 254                | 488nt | 2x (CATT) <sub>1</sub> . |                     |                            |                                                                               |                                                                   | AACCATGGA | 273 |
| 29 | At3g20750 | 88                 | 189nt |                          |                     |                            | 2x A <sub>5</sub> T.                                                          |                                                                   | AAAAATGGA | 177 |

**Table II, Supplemental Material. Sequences of primers used for quantitative RT-PCR analysis of GATA gene expression patterns.**

<sup>a</sup> Gene names are given according to Jeong and Shih (2003). However, primer names are based on a numbering scheme used in our laboratory before this publication. <sup>b</sup> Genes numbered 26-29 were not identified by Jeong and Shih (2003) and we have therefore numbered them sequentially.

| Gene name                | AGI code  | Primer name          | Primer sequence (5' – 3') |
|--------------------------|-----------|----------------------|---------------------------|
| <i>GATA1<sup>a</sup></i> | At3g24050 | GATA1(Q-PCR_left)    | CTTTCACGGCGGAGTTACAT      |
|                          |           | GATA1(Q-PCR_right)   | ATCTTTCCGATCACCGTCAC      |
| <i>GATA2</i>             | At2g45050 | GATA2(Q-PCR_left)    | GCCAAATTCAAGCCAAAAGAA     |
|                          |           | GATA2(Q-PCR_right)   | CCGTAGTCTCCGATGACGAT      |
| <i>GATA3</i>             | At4g34680 | GATA3(Q-PCR_left)    | CCGGTTAAACCAAGAACCAA      |
|                          |           | GATA3(Q-PCR_rt_2)    | CTGTTGCTGCATGTTGATGA      |
| <i>GATA4</i>             | At4g60530 | GATA4(Q-PCR_left)    | CCCAGCAAATCCTTTAACCA      |
|                          |           | GATA4(Q-PCR_rt_2)    | AAGGTGCTGGTGCTCTTGAT      |
| <i>GATA5</i>             | At5g66320 | GATA8(Q-PCR_left)    | AGAGCAGCGTCAGGAAAGAG      |
|                          |           | GATA8(Q-PCR_right)   | GACGGAAAAGCCATTTTGAG      |
| <i>GATA6</i>             | At3g51080 | GATA9(Q-PCR_left)    | CACCGCTGATTTCCACACTA      |
|                          |           | GATA9(Q-PCR_right)   | CGGCGTGAAAGAAGAATCAT      |
| <i>GATA7</i>             | At4g36240 | GATA7(Q-PCR_left_2)  | GGAGACAGTGCGTTCCTGTT      |
|                          |           | GATA7(Q-PCR_right_2) | CGGTGGATAGCAGAGGAGAT      |
| <i>GATA8 (BME3)</i>      | At3g54810 | GATA11(Q-PCR_left)   | CCCTTGTTCTCCCTGGAAAG      |
|                          |           | GATA11(Q-PCR_right)  | ACCGCACACATTGTCTTTGA      |
| <i>GATA9</i>             | At4g32890 | GATA12(Q-PCR_left)   | GTGGGCTTCCCGTCTTTTAT      |
|                          |           | GATA12(Q-PCR_right)  | CGGCGAAGTCTTGTCTTTTC      |
| <i>GATA10</i>            | At1g08000 | GATA15(Q-PCR_left)   | GTGAATCAGTAACCGAGGGT      |
|                          |           | GATA15(Q-PCR_right)  | AGACTCGGTGTGGGTGATC       |
| <i>GATA11</i>            | At1g08010 | GATA16(Q-PCR_left)   | GCAAACCTGAATCCGAGTG       |
|                          |           | GATA16(Q-PCR_right)  | AGAGACCGTGCGGGTGGT        |
| <i>GATA12</i>            | At5g25830 | GATA13(Q-PCR_left)   | ACCATCACGGTACGGACACT      |
|                          |           | GATA13(Q-PCR_right)  | CAACGTTGTGGTGGATCAAG      |
| <i>GATA13</i>            | At2g28340 | GATA17(Q-PCR_left)   | AGCTCGTACCTCCACCATTG      |
|                          |           | GATA17(Q-PCR_right)  | TCAAAAATTGGCACATGCTTC     |
| <i>GATA14</i>            | At3g45170 | GATA14(Q-PCR_left)   | CGAGAAAGACTCCGCTATGG      |

|                                  |           |                        |                           |
|----------------------------------|-----------|------------------------|---------------------------|
|                                  |           | GATA14(Q-PCR_right)    | ACCTGTCCTGTATCGCATCC      |
| <i>GATA15</i>                    | At3g06740 | GATA24(Q-PCR_left)     | AGAAACCCGAAGTTTGGGTGA     |
|                                  |           | GATA24(Q-PCR_right)    | TGATCGCTGCATCATCACTT      |
| <i>GATA16</i>                    | At5g49300 | GATA26(Q-PCR_left)     | CGGAAACCGTAAATTTGGTG      |
|                                  |           | GATA26(Q-PCR_right)    | GTTGCTTCTCCACCGTTGAT      |
| <i>GATA17</i>                    | At3g16870 | GATA23(Q-PCR_left)     | TCTGAGGGATCAGAAGATACGA    |
|                                  |           | GATA23(Q-PCR_right)    | GCTGCTACTGCAGTTCTCGTT     |
| <i>GATA18 (HAN)</i>              | At3g50870 | GATA22(Q-PCR_left)     | GGTTCAAACCGACCAGTACG      |
|                                  |           | GATA22(Q-PCR_right)    | GAGCCCACGGAGTACCATTA      |
| <i>GATA19 (HANL2)</i>            | At4g36620 | GATA6(Q-PCR_left)      | CTCTGCAACGAGGATGATGA      |
|                                  |           | GATA6(Q-PCR_right)     | TGGAACCGTTCAAGAAGTCC      |
| <i>GATA20 (HANL1)</i>            | At2g18380 | GATA21(Q-PCR_left)     | GACGGCCAGAACTTAACGA       |
|                                  |           | GATA21(Q-PCR_right)    | TCCACCTCCGTTGTACGAAT      |
| <i>GATA21 (GNC)</i>              | At5g56860 | GATA25(Q-PCR_left)     | AAGACCAACCCCATCCTCTT      |
|                                  |           | GATA25(Q-PCR_right)    | CATCTTTGGGGACATCAACC      |
| <i>GATA22</i>                    | At4g26150 | GATA20(Q-PCR_left)     | TGCCCCATAAGGTAAACACG      |
|                                  |           | GATA20(Q-PCR_right)    | AGTTGCTCTGGGTCTCCAAA      |
| <i>GATA23</i>                    | At5g26930 | GATA5(Q-PCR_left)      | TGGATCCAAGGAAGCTACTATC    |
|                                  |           | GATA5(Q-PCR_right)     | TCACTGCAACACCTAATTGTCC    |
| <i>GATA24 (ZML1)</i>             | At3g21175 | GATA19utr(Q-PCR_left)  | ACGCAAATCTTGAGGCTGAT      |
|                                  |           | GATA19utr(Q-PCR_right) | TGGTTTCTCAGTTCTCACTGTGT   |
| <i>GATA25 (ZIM)</i>              | At4g24470 | GATA18(Q-PCR_left)     | AAGATACGGTGTTCGCCAAG      |
|                                  |           | GATA18(Q-PCR_right)    | AGCCCCATCTGTCATCTTTG      |
| <i>GATA26<sup>b</sup></i>        | At4g17570 | GATA27(Q-PCR_left)     | AAGGGACCGGAGATTCTGTT      |
|                                  |           | GATA27(Q-PCR_right)    | TGGTTTTCATAGCGCCTCTT      |
| <i>GATA27<sup>b</sup></i>        | At5g47140 | GATA28(Q-PCR_left)     | AAGATTCCCAAGAGGAAACCA     |
|                                  |           | GATA28(Q-PCR_right)    | TCCTCTTGAAACCGGTATGG      |
| <i>GATA28<sup>b</sup> (ZML2)</i> | At1g51600 | GATA29(Q-PCR_left)     | TGAATCGCCTCAGGTTCTGT      |
|                                  |           | GATA29(Q-PCR_right)    | TCAAATCCTGATAACCTAAATCGAG |
| <i>GATA29<sup>b</sup></i>        | At3g20750 | GATA30(Q-PCR_left)     | TCCTATGTGGCGAAGAGGTC      |
|                                  |           | GATA30(Q-PCR_right)    | TTTGGCTTTCCTCTCTTCCTC     |
| <i>CCA1</i>                      | At2g46830 | CCA1(Q-PCR_left)       | AAGGCTCGATCTTCACTGGA      |
|                                  |           | CCA1(Q-PCR_right)      | TCTCCTGCTCCATCTGAACC      |
